# Supplementary material for: Correction of erroneously packed protein's side chains in the NMR structure based on ab initio chemical shift calculations
Source: Royal Society of Chemistry journal article supplement (doi:10.1039/c4cp02553a), 2014-07-16
Supplement: c4cp02553a1.pdf [file c4cp02553a1.pdf]

Supplementary materials for

**Correction of Erroneously Packed Protein's Side Chain in NMR  
Structure Based on *Ab Initio* Chemical Shift Calculations**

*Tong Zhu<sup>1</sup>, John Z.H. Zhang<sup>1,2</sup> and Xiao He<sup>1,2\*</sup>*

*<sup>1</sup>State Key Laboratory of Precision Spectroscopy, Institute of Theoretical and  
Computational Science, East China Normal University, Shanghai, 200062, China*

*<sup>2</sup>NYU-ECNU Center for Computational Chemistry at NYU Shanghai, Shanghai,  
200062, China*

\* To whom correspondence should be addressed: [xiaohe@phy.ecnu.edu.cn](mailto:xiaohe@phy.ecnu.edu.cn)

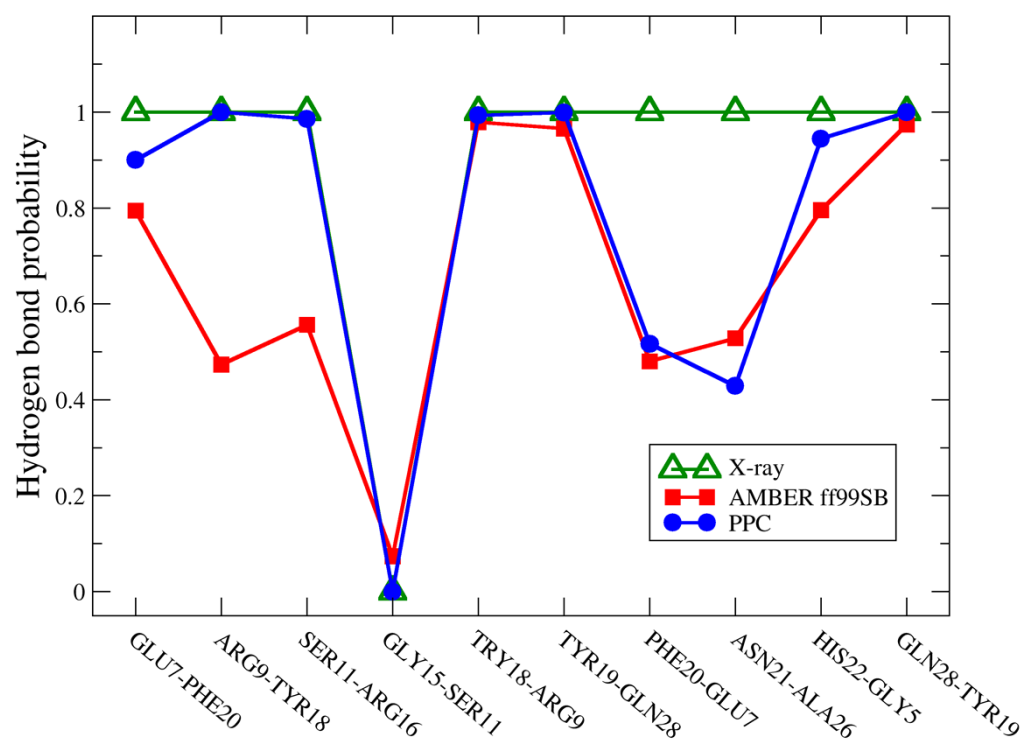

**Figure S1.** Hydrogen bond probabilities of several important hydrogen bonds in Pin1 WW domain during MD simulations using the Amber ff99SB and PPC charge models.

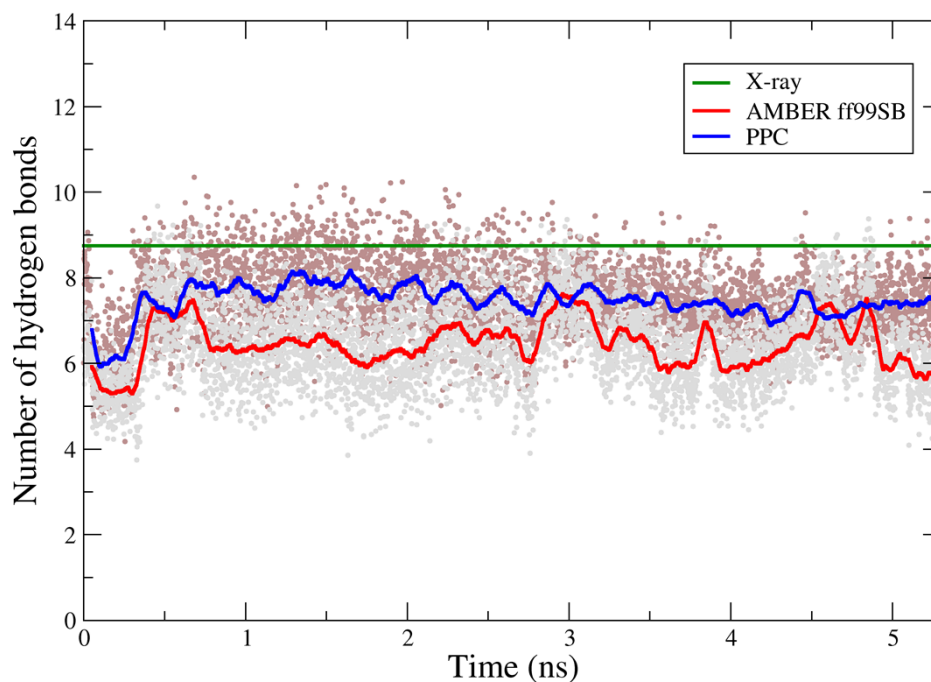

**Figure S2.** Number of hydrogen bonds in Pin1 WW domain as a function of MD simulation time for both Amber ff99SB and PPC trajectories. Red (Amber) and blue (PPC) lines are average values for every 100 ps. The hydrogen bonds were counted using a sigmoidal function of the donor-acceptor distance  $d$  as  $f_{\text{HB}}(d) = 1/(1 + (d/2.6)^6)$  related to the strength of hydrogen bonds<sup>1</sup>.

#### References:

1. Gao, Y.; Lu, X.; Duan, L. L.; Zhang, J. Z. H.; Mei, Y., Polarization of Intraprotein Hydrogen Bond Is Critical to Thermal Stability of Short Helix. *J. Phys. Chem. B* **2012**, 116, 549-554.
